# Supplementary material
Source: publisher figshare collection journal article supplement (https://acs.figshare.com/ndownloader/files/4241977)
Supplement: Supplementary file 1 [file 4241977]

## Supporting Information

XRD of the samples annealed at various temperatures are shown in Figure 1.

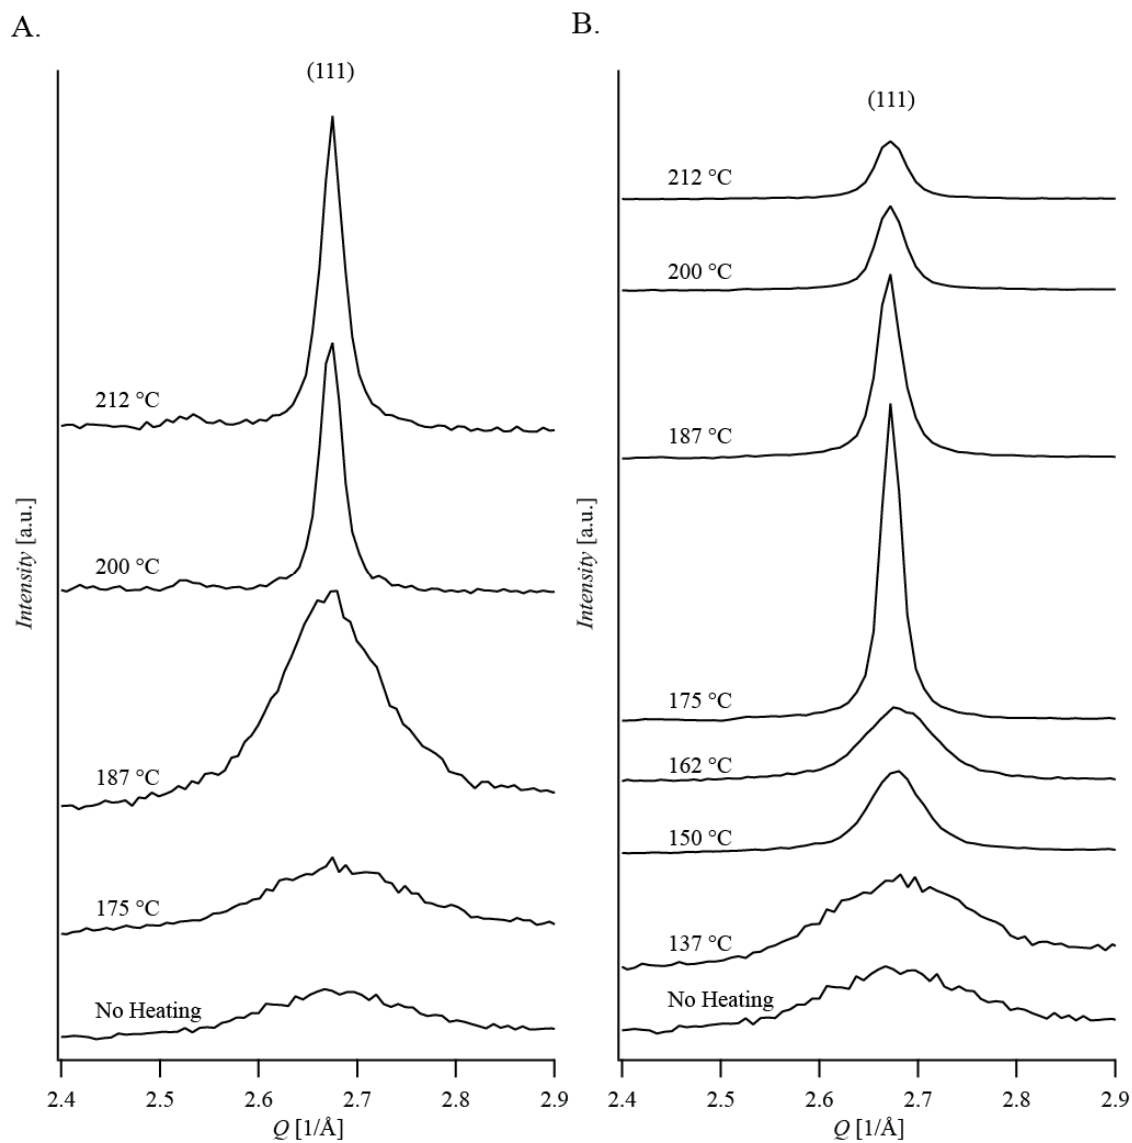

**Figure 1:** XRD patterns from samples annealed in both A) inert and B) air environments.
